# Supplementary material for: IQ, Educational Attainment, Memory and Plasma Lipids: Associations with Apolipoprotein E Genotype in 5995 Children
Source: PubMed Central journal article supplement (PMC3130925; doi:10.1016/j.biopsych.2010.10.033), 2011-07-15
Supplement: mmc1.pdf [file mmc1.pdf]

## Supplemental Information

Table S1. Lipid levels by *APOE* genotype in males

| Genotype                | N   | Total cholesterol (mmol/l) |                    |                  |                | LDL cholesterol (mmol/l) |                    |                  |                | HDL cholesterol (mmol/l) |                    |                   |                | Triglyceride <sup>c</sup> (mmol/l) |              |                    |                |                |
|-------------------------|-----|----------------------------|--------------------|------------------|----------------|--------------------------|--------------------|------------------|----------------|--------------------------|--------------------|-------------------|----------------|------------------------------------|--------------|--------------------|----------------|----------------|
|                         |     | Mean (SD)                  | Coeff <sup>a</sup> | 95% CI           | p <sup>b</sup> | Mean (SD)                | Coeff <sup>a</sup> | 95% CI           | p <sup>b</sup> | Mean (SD)                | Coeff <sup>a</sup> | 95% CI            | p <sup>b</sup> | Geometric mean                     | (IQR)        | Coeff <sup>a</sup> | 95% CI         | p <sup>b</sup> |
| $\epsilon 2/\epsilon 2$ | 14  | 3.52 (0.64)                | -0.65              | (-0.99 to -0.32) |                | 1.33 (0.68)              | -0.92              | (-1.21 to -0.63) |                | 1.56 (0.51)              | 0.13               | (-0.03 to 0.30)   |                | 1.30                               | (0.94-1.86)  | 1.34               | (1.06 to 1.68) |                |
| $\epsilon 2/\epsilon 3$ | 231 | 3.92 (0.55)                | -0.26              | (-0.35 to -0.17) |                | 1.89 (0.46)              | -0.36              | (-0.44 to -0.28) |                | 1.52 (0.31)              | 0.08               | (0.04 to 0.13)    |                | 1.03                               | (0.77-1.34)  | 1.06               | (0.99 to 1.13) |                |
| $\epsilon 2/\epsilon 4$ | 41  | 4.06 (0.75)                | -0.12              | (-0.32 to 0.08)  |                | 2.02 (0.61)              | -0.23              | (-0.40 to -0.06) |                | 1.48 (0.39)              | 0.05               | (-0.05 to 0.15)   |                | 1.07                               | (0.91-1.27)  | 1.11               | (0.97 to 1.27) |                |
| $\epsilon 3/\epsilon 3$ | 885 | 4.18 (0.65)                | 0                  | -                |                | 2.26 (0.56)              | 0                  | -                |                | 1.43 (0.31)              | 0                  | -                 |                | 0.97                               | (0.72- 1.30) | 0                  | -              |                |
| $\epsilon 3/\epsilon 4$ | 380 | 4.36 (0.64)                | 0.19               | (0.11 to 0.26)   |                | 2.46 (0.56)              | 0.20               | (0.14 to 0.27)   |                | 1.39 (0.31)              | -0.04              | (-0.08 to -0.003) |                | 1.02                               | (0.75-1.35)  | 1.05               | (1.00 to 1.11) |                |
| $\epsilon 4/\epsilon 4$ | 30  | 4.62 (0.57)                | 0.44               | (0.21 to 0.67)   | <0.0001        | 2.73 (0.49)              | 0.47               | (0.27 to 0.67)   | <0.0001        | 1.27 (0.23)              | -0.16              | (-0.27 to -0.04)  | <0.0001        | 1.26                               | (0.95-1.77)  | 1.30               | (1.11 to 1.53) | 0.001          |

Table S2. Lipid levels by *APOE* genotype in females

| Genotype                | N   | Total cholesterol (mmol/l) |                    |                  |                | LDL cholesterol (mmol/l) |                    |                  |                | HDL cholesterol (mmol/l) |                    |                  |                | Triglyceride <sup>c</sup> (mmol/l) |             |                    |                |                |
|-------------------------|-----|----------------------------|--------------------|------------------|----------------|--------------------------|--------------------|------------------|----------------|--------------------------|--------------------|------------------|----------------|------------------------------------|-------------|--------------------|----------------|----------------|
|                         |     | Mean (SD)                  | Coeff <sup>a</sup> | 95% CI           | p <sup>b</sup> | Mean (SD)                | Coeff <sup>a</sup> | 95% CI           | p <sup>b</sup> | Mean (SD)                | Coeff <sup>a</sup> | 95% CI           | p <sup>b</sup> | Geometric mean                     | (IQR)       | Coeff <sup>a</sup> | 95% CI         | p <sup>b</sup> |
| $\epsilon 2/\epsilon 2$ | 12  | 3.70 (0.67)                | -0.63              | (-0.97 to -0.28) |                | 1.44 (0.66)              | -1.00              | (-1.32 to -0.69) |                | 1.54 (0.36)              | 0.18               | (0.008 to 0.34)  |                | 1.40                               | (0.99-1.89) | 1.35               | (1.06 to 1.71) |                |
| $\epsilon 2/\epsilon 3$ | 151 | 4.00 (0.62)                | -0.34              | (-0.44 to -0.23) |                | 2.04 (0.51)              | -0.40              | (-0.50 to -0.31) |                | 1.43 (0.35)              | 0.06               | (0.01 to 0.12)   |                | 1.06                               | (0.81-1.4)  | 1.02               | (0.95 to 1.10) |                |
| $\epsilon 2/\epsilon 4$ | 33  | 4.31 (0.46)                | -0.02              | (-0.23 to 0.20)  |                | 2.30 (0.39)              | -0.15              | (-0.34 to 0.04)  |                | 1.41 (0.33)              | 0.05               | (-0.06 to 0.15)  |                | 1.22                               | (1.05-1.41) | 1.17               | (1.01 to 1.36) |                |
| $\epsilon 3/\epsilon 3$ | 741 | 4.33 (0.64)                | 0                  | -                |                | 2.45 (0.56)              | 0                  | -                |                | 1.36 (0.30)              | 0                  | -                |                | 1.04                               | (0.77-1.35) | 0                  | -              |                |
| $\epsilon 3/\epsilon 4$ | 329 | 4.42 (0.60)                | 0.09               | (0.005 to 0.17)  |                | 2.56 (0.55)              | 0.12               | (0.05 to 0.19)   |                | 1.29 (0.27)              | -0.07              | (-0.11 to -0.03) |                | 1.13                               | (0.84-1.51) | 1.09               | (1.03 to 1.15) |                |
| $\epsilon 4/\epsilon 4$ | 28  | 4.67 (0.58)                | 0.34               | (0.10 to 0.57)   | <0.0001        | 2.71 (0.57)              | 0.26               | (0.05 to 0.47)   | <0.0001        | 1.35 (0.21)              | -0.02              | (-0.13 to 0.10)  | <0.0001        | 1.25                               | (1.01-1.50) | 1.20               | (1.03 to 1.41) | 0.0006         |

<sup>a</sup> Coefficient from linear regression adjusted for age with  $\epsilon 3/\epsilon 3$  genotype as reference group

<sup>b</sup> P values for heterogeneity from analysis of covariance model

<sup>c</sup> Triglycerides are log transformed so coefficients represent ratio of geometric means

**Table S3. Associations of lipids (in quartiles) with IQ****All children (N = 3713)**

|                   | Quartile | Age, sex adjusted                 |                |      | All adjusted <sup>b</sup> |                                   |               |      |
|-------------------|----------|-----------------------------------|----------------|------|---------------------------|-----------------------------------|---------------|------|
|                   |          | Coeff <sup>a</sup><br>(IQ points) | 95% CI         | P    | Quartile                  | Coeff <sup>a</sup><br>(IQ points) | 95% CI        | P    |
| Total cholesterol | 1        | -                                 | -              | -    | 1                         | -                                 | -             | -    |
|                   | 2        | -0.48                             | (-1.93, 0.97)  | 0.52 | 2                         | -0.13                             | (-1.47, 1.21) | 0.85 |
|                   | 3        | -0.31                             | (-1.75, 1.13)  | 0.67 | 3                         | 0.26                              | (-1.07, 1.59) | 0.70 |
|                   | 4        | -1.03                             | (-2.49, 0.42)  | 0.16 | 4                         | -0.60                             | (-1.94, 0.74) | 0.38 |
| LDL               | 1        | -                                 | -              | -    | 1                         | -                                 | -             | -    |
|                   | 2        | -1.83                             | (-3.29, -0.38) | 0.01 | 2                         | -1.17                             | (-2.51, 0.17) | 0.09 |
|                   | 3        | -0.64                             | (-2.10, 0.82)  | 0.39 | 3                         | -0.21                             | (-1.56, 1.14) | 0.76 |
|                   | 4        | -1.52                             | (-2.99, -0.05) | 0.04 | 4                         | -0.83                             | (-2.18, 0.53) | 0.23 |
| HDL               | 1        | -                                 | -              | -    | 1                         | -                                 | -             | -    |
|                   | 2        | 0.61                              | (-0.82, 2.05)  | 0.40 | 2                         | 0.14                              | (-1.18, 1.46) | 0.84 |
|                   | 3        | -0.0005                           | (-1.46, 1.46)  | 1.00 | 3                         | -0.23                             | (-1.57, 1.12) | 0.74 |
|                   | 4        | 0.31                              | (-1.15, 1.77)  | 0.68 | 4                         | -0.05                             | (-1.40, 1.30) | 0.94 |
| Triglycerides     | 1        | -                                 | -              | -    | 1                         | -                                 | -             | -    |
|                   | 2        | 1.45                              | (-0.004, 2.90) | 0.05 | 2                         | 0.84                              | (-0.50, 2.18) | 0.22 |
|                   | 3        | 0.75                              | (-0.70, 2.20)  | 0.31 | 3                         | 0.20                              | (-1.14, 1.54) | 0.77 |
|                   | 4        | 0.62                              | (-0.84, 2.08)  | 0.40 | 4                         | 0.44                              | (-0.91, 1.79) | 0.52 |

**Table S3 continued****Children with *APOE* genotype available (N = 2254)**

|                   | Age, sex adjusted |                                |                |        | All adjusted <sup>b</sup> |                                |                |       |
|-------------------|-------------------|--------------------------------|----------------|--------|---------------------------|--------------------------------|----------------|-------|
|                   | Quartile          | Coeff (IQ points) <sup>a</sup> | 95% CI         | P      | Quartile                  | Coeff (IQ points) <sup>a</sup> | 95% CI         | P     |
| Total cholesterol | 1                 | -                              | -              | -      | 1                         | -                              | -              | -     |
|                   | 2                 | -1.58                          | (-3.42, 0.25)  | 0.09   | 2                         | -1.11                          | (-2.82, 0.59)  | 0.20  |
|                   | 3                 | -0.80                          | (-2.64, 1.04)  | 0.39   | 3                         | -0.38                          | (-2.09, 1.32)  | 0.66  |
|                   | 4                 | -1.79                          | (-3.66, 0.07)  | 0.06   | 4                         | -1.55                          | (-3.28, 0.18)  | 0.08  |
| LDL               | 1                 | -                              | -              | -      | 1                         | -                              | -              | -     |
|                   | 2                 | -3.54                          | (-5.38, -1.71) | <0.001 | 2                         | -2.86                          | (-4.57, -1.16) | 0.001 |
|                   | 3                 | -1.51                          | (-3.38, 0.36)  | 0.11   | 3                         | -1.26                          | (-2.99, 0.48)  | 0.16  |
|                   | 4                 | -2.51                          | (-4.38, -0.65) | 0.01   | 4                         | -2.23                          | (-3.96, -0.50) | 0.01  |
| HDL               | 1                 | -                              | -              | -      | 1                         | -                              | -              | -     |
|                   | 2                 | 0.32                           | (-1.53, 2.17)  | 0.74   | 2                         | -0.06                          | (-1.77, 1.66)  | 0.95  |
|                   | 3                 | -0.51                          | (-2.37, 1.35)  | 0.59   | 3                         | -0.36                          | (-2.09, 1.36)  | 0.68  |
|                   | 4                 | -0.60                          | (-2.47, 1.27)  | 0.53   | 4                         | -0.55                          | (-2.29, 1.19)  | 0.53  |
| Triglycerides     | 1                 | -                              | -              | -      | 1                         | -                              | -              | -     |
|                   | 2                 | 1.96                           | (0.09, 3.84)   | 0.04   | 2                         | 0.83                           | (-0.92, 2.58)  | 0.35  |
|                   | 3                 | 1.60                           | (-0.24, 3.45)  | 0.09   | 3                         | 0.44                           | (-1.28, 2.16)  | 0.61  |
|                   | 4                 | 1.34                           | (-0.54, 3.22)  | 0.16   | 4                         | 0.56                           | (-1.19, 2.31)  | 0.53  |

<sup>a</sup> Coefficients represent change in IQ points for each quartile of lipid compared to the lowest quartile<sup>b</sup> Age, sex, maternal education, household social class adjusted

Quartiles (all in mmol/l): Total cholesterol: &lt;3.83, 3.84-4.23, 4.24-4.67, &gt;4.67; LDL cholesterol: &lt;1.96, 1.96-2.31, 2.31-2.71, &gt;2.71; HDL cholesterol: &lt;1.19, 1.2-1.38, 1.39-1.60, 1.61-2.88 Triglycerides: &lt;0.77, 0.77-1.01, 1.02-1.38, &gt;1.38

**Table S4. Associations of lipids with cognitive function measures**

|                                    | Age, sex adjusted |                    |                |      | Fully adjusted <sup>c</sup> |                    |               |      |
|------------------------------------|-------------------|--------------------|----------------|------|-----------------------------|--------------------|---------------|------|
|                                    | N                 | Coeff <sup>b</sup> | 95% CI         | p    | N                           | Coeff <sup>b</sup> | 95% CI        | p    |
| <b>Key stage 3 English</b>         |                   |                    |                |      |                             |                    |               |      |
| Total cholesterol (mmol/l)         | 3270              | -0.76              | (1.60, 0.08)   | 0.07 | 3270                        | -0.49              | (-1.27, 0.28) | 0.21 |
| LDL cholesterol (mmol/l)           | 3270              | -1.05              | (-1.97, -0.12) | 0.03 | 3270                        | -0.72              | (-1.58, 0.13) | 0.10 |
| HDL cholesterol (mmol/l)           | 3270              | -0.69              | (-2.49, 1.11)  | 0.45 | 3270                        | -0.81              | (-2.48, 0.86) | 0.34 |
| Triglyceride <sup>a</sup> (mmol/l) | 3270              | 1.25               | (-0.03, 2.52)  | 0.06 | 3270                        | 1.17               | (-0.01, 2.35) | 0.05 |
| <b>Key stage 3 Maths</b>           |                   |                    |                |      |                             |                    |               |      |
| Total cholesterol (mmol/l)         | 3305              | -1.08              | (-2.17, 0.01)  | 0.05 | 3305                        | -0.80              | (-1.84, 0.24) | 0.13 |
| LDL cholesterol (mmol/l)           | 3305              | -1.16              | (-2.36, 0.04)  | 0.06 | 3305                        | -0.80              | (-1.95, 0.35) | 0.17 |
| HDL cholesterol (mmol/l)           | 3305              | -0.34              | (-2.69, 2.00)  | 0.77 | 3305                        | -0.53              | (-2.77, 1.71) | 0.64 |
| Triglyceride <sup>a</sup> (mmol/l) | 3305              | 0.31               | (-1.35, 1.97)  | 0.71 | 3305                        | 0.26               | (-1.33, 1.85) | 0.75 |
| <b>Key stage 3 Science</b>         |                   |                    |                |      |                             |                    |               |      |
| Total cholesterol (mmol/l)         | 3322              | -0.70              | (-1.89, 0.48)  | 0.25 | 3322                        | -0.53              | (-1.71, 0.64) | 0.38 |
| LDL cholesterol (mmol/l)           | 3322              | -0.54              | (-1.85, 0.78)  | 0.42 | 3322                        | -0.31              | (-1.61, 0.98) | 0.64 |
| HDL cholesterol (mmol/l)           | 3322              | -1.05              | (-3.60, 1.49)  | 0.42 | 3322                        | -1.21              | (-3.73, 1.32) | 0.35 |
| Triglyceride <sup>a</sup> (mmol/l) | 3322              | 0.44               | (-1.38, 2.25)  | 0.64 | 3322                        | 0.43               | (-1.37, 2.22) | 0.64 |
| <b>Key stage 2 English</b>         |                   |                    |                |      |                             |                    |               |      |
| Total cholesterol (mmol/l)         | 3772              | -0.47              | (-1.15, 0.21)  | 0.18 | 3772                        | -0.27              | (-0.91, 0.36) | 0.40 |
| LDL cholesterol (mmol/l)           | 3772              | -0.68              | (-1.44, 0.07)  | 0.08 | 3772                        | -0.41              | (-1.11, 0.30) | 0.26 |
| HDL cholesterol (mmol/l)           | 3772              | 0.55               | (-0.92, 2.01)  | 0.46 | 3772                        | 0.31               | (-1.06, 1.68) | 0.65 |
| Triglyceride <sup>a</sup> (mmol/l) | 3772              | 0.07               | (-0.97, 1.11)  | 0.89 | 3772                        | -0.02              | (-0.99, 0.95) | 0.97 |

**Table S4 continued****Key stage 2 Maths**

|                                    |      |       |                |      |      |       |                |      |
|------------------------------------|------|-------|----------------|------|------|-------|----------------|------|
| Total cholesterol (mmol/l)         | 3777 | -1.21 | (2.14, 0.29)   | 0.01 | 3777 | -0.93 | (-1.80, -0.06) | 0.04 |
| LDL cholesterol (mmol/l)           | 3777 | -1.25 | (-2.27, -0.22) | 0.02 | 3777 | -0.89 | (-1.86, 0.07)  | 0.07 |
| HDL cholesterol (mmol/l)           | 3777 | -0.28 | (-2.27, 1.71)  | 0.78 | 3777 | -0.46 | (-2.33, 1.41)  | 0.63 |
| Triglyceride <sup>a</sup> (mmol/l) | 3777 | -0.28 | (-1.70, 1.14)  | 0.70 | 3777 | -0.38 | (-1.71, 0.96)  | 0.58 |

**Key stage 2 Science**

|                                    |      |       |                |      |      |       |               |      |
|------------------------------------|------|-------|----------------|------|------|-------|---------------|------|
| Total cholesterol (mmol/l)         | 3790 | -0.57 | (-1.08, -0.07) | 0.03 | 3790 | -0.42 | (-0.89, 0.06) | 0.08 |
| LDL cholesterol (mmol/l)           | 3790 | -0.57 | (-1.13, 0.00)  | 0.05 | 3790 | -0.36 | (-0.88, 0.17) | 0.18 |
| HDL cholesterol (mmol/l)           | 3790 | -0.60 | (-1.69, 0.49)  | 0.28 | 3790 | -0.68 | (-1.70, 0.34) | 0.19 |
| Triglyceride <sup>a</sup> (mmol/l) | 3790 | 0.05  | (-0.55, 0.65)  | 0.87 | 3790 | 0.28  | (-0.44, 1.01) | 0.44 |

**Working memory global score**

|                                    |      |       |               |      |      |       |               |      |
|------------------------------------|------|-------|---------------|------|------|-------|---------------|------|
| Total cholesterol (mmol/l)         | 3582 | 0.004 | (-0.37, 0.38) | 0.98 | 3582 | 0.07  | (-0.30, 0.44) | 0.70 |
| LDL cholesterol (mmol/l)           | 3582 | -0.11 | (-0.53, 0.31) | 0.60 | 3582 | -0.01 | (-0.43, 0.40) | 0.94 |
| HDL cholesterol (mmol/l)           | 3582 | 0.26  | (-0.56, 1.08) | 0.53 | 3582 | 0.21  | (-0.59, 1.01) | 0.61 |
| Triglyceride <sup>a</sup> (mmol/l) | 3582 | 0.08  | (-0.50, 0.66) | 0.78 | 3582 | 0.04  | (-0.53, 0.61) | 0.89 |

**Non word repetition**

|                                    |      |       |               |      |      |       |                |      |
|------------------------------------|------|-------|---------------|------|------|-------|----------------|------|
| Total cholesterol (mmol/l)         | 3736 | -0.17 | (0.29, 0.05)  | 0.01 | 3736 | -0.14 | (-0.26, -0.02) | 0.02 |
| LDL cholesterol (mmol/l)           | 3736 | -0.18 | (0.32, 0.05)  | 0.01 | 3736 | -0.14 | (-0.27, -0.01) | 0.03 |
| HDL cholesterol (mmol/l)           | 3736 | -0.07 | (-0.33, 0.19) | 0.58 | 3736 | -0.10 | (-0.35, 0.16)  | 0.46 |
| Triglyceride <sup>a</sup> (mmol/l) | 3736 | -0.05 | (-0.23, 0.13) | 0.59 | 3736 | -0.06 | (-0.24, 0.12)  | 0.49 |

<sup>a</sup>Triglyceride is log transformed<sup>b</sup>Coefficients from linear regression represent increase in IQ points per mmol/l increase in lipid measure<sup>c</sup>Age, sex, maternal education, household social class adjusted

**Table S5. Associations of lipids (in quartiles) with cognitive function measures**

|                    |                   | Quartile | Age, sex adjusted |                    |               |      | Quartile | All adjusted <sup>b</sup> |                    |               |      |
|--------------------|-------------------|----------|-------------------|--------------------|---------------|------|----------|---------------------------|--------------------|---------------|------|
|                    |                   |          | N                 | Coeff <sup>a</sup> | 95% CI        | P    |          | N                         | Coeff <sup>a</sup> | 95% CI        | P    |
| <b>Key stage 3</b> |                   |          |                   |                    |               |      |          |                           |                    |               |      |
| <b>English</b>     | Total Cholesterol | 1        | 812               | -                  | -             | -    | 1        | 812                       | -                  | -             | -    |
|                    |                   | 2        | 815               | -0.98              | (-2.55, 0.58) | 0.22 | 2        | 815                       | -0.47              | (-1.91, 0.98) | 0.53 |
|                    |                   | 3        | 819               | -0.74              | (-2.31, 0.82) | 0.35 | 3        | 819                       | -0.19              | (-1.64, 1.26) | 0.8  |
|                    |                   | 4        | 824               | -1.15              | (-2.71, 0.42) | 0.15 | 4        | 824                       | -0.65              | (-2.10, 0.80) | 0.38 |
|                    | LDL               | 1        | 781               | -                  | -             | -    | 1        | 781                       | -                  | -             | -    |
|                    |                   | 2        | 818               | -1.02              | (-2.60, 0.56) | 0.21 | 2        | 818                       | -0.53              | (-1.99, 0.93) | 0.48 |
|                    |                   | 3        | 852               | -0.08              | (-1.65, 1.49) | 0.92 | 3        | 852                       | 0.18               | (-1.28, 1.64) | 0.81 |
|                    |                   | 4        | 819               | -1.19              | (-2.78, 0.40) | 0.14 | 4        | 819                       | -0.63              | (-2.11, 0.84) | 0.4  |
|                    | HDL               | 1        | 854               | -                  | -             | -    | 1        | 854                       | -                  | -             | -    |
|                    |                   | 2        | 826               | 0.38               | (-1.16, 1.92) | 0.63 | 2        | 826                       | 0.22               | (-1.21, 1.64) | 0.77 |
|                    |                   | 3        | 792               | -0.95              | (-2.51, 0.61) | 0.23 | 3        | 792                       | -0.67              | (-2.12, 0.77) | 0.36 |
|                    |                   | 4        | 798               | -0.53              | (-2.09, 1.03) | 0.5  | 4        | 798                       | -0.79              | (-2.24, 0.65) | 0.28 |
| Triglycerides      | 1                 | 856      | -                 | -                  | -             | 1    | 856      | -                         | -                  | -             |      |
|                    | 2                 | 815      | 0.38              | (-1.16, 1.93)      | 0.63          | 2    | 815      | -0.13                     | (-1.56, 1.30)      | 0.85          |      |
|                    | 3                 | 808      | 2.22              | (0.67, 3.77)       | 0.01          | 3    | 808      | 1.62                      | (0.18, 3.05)       | 0.03          |      |
|                    | 4                 | 791      | 0.72              | (-0.83, 2.28)      | 0.36          | 4    | 791      | 0.60                      | (-0.84, 2.04)      | 0.42          |      |
| <b>Maths</b>       | Total Cholesterol | 1        | 824               | -                  | -             | -    | 1        | 824                       | -                  | -             | -    |
|                    |                   | 2        | 819               | 0.52               | (-1.51, 2.56) | 0.61 | 2        | 819                       | 1.06               | (-0.89, 3.00) | 0.29 |
|                    |                   | 3        | 834               | -0.71              | (-2.74, 1.32) | 0.49 | 3        | 834                       | -0.11              | (-2.05, 1.84) | 0.91 |
|                    |                   | 4        | 828               | -0.98              | (-3.01, 1.06) | 0.35 | 4        | 828                       | -0.48              | (-2.42, 1.47) | 0.63 |

|                |               |   |     |       |               |      |   |     |       |               |      |
|----------------|---------------|---|-----|-------|---------------|------|---|-----|-------|---------------|------|
|                | LDL           | 1 | 792 | -     | -             | -    | 1 | 792 | -     | -             | -    |
|                |               | 2 | 827 | -1.57 | (-3.62, 0.48) | 0.13 | 2 | 827 | -1.01 | (-2.97, 0.95) | 0.31 |
|                |               | 3 | 860 | -0.15 | (-2.19, 1.89) | 0.88 | 3 | 860 | 0.18  | (-1.78, 2.13) | 0.86 |
|                |               | 4 | 826 | -2.00 | (-4.07, 0.06) | 0.06 | 4 | 826 | -1.41 | (-3.39, 0.56) | 0.16 |
|                | HDL           | 1 | 869 | -     | -             | -    | 1 | 869 | -     | -             | -    |
|                |               | 2 | 833 | 1.18  | (-0.81, 3.18) | 0.25 | 2 | 833 | 0.97  | (-0.94, 2.88) | 0.32 |
|                |               | 3 | 802 | 0.59  | (-1.43, 2.62) | 0.57 | 3 | 802 | 0.87  | (-1.07, 2.80) | 0.38 |
|                |               | 4 | 801 | 0.31  | (-1.72, 2.34) | 0.76 | 4 | 801 | -0.04 | (-1.98, 1.90) | 0.97 |
|                | Triglycerides | 1 | 857 | -     | -             | -    | 1 | 857 | -     | -             | -    |
|                |               | 2 | 823 | 0.98  | (-1.04, 2.99) | 0.34 | 2 | 823 | 0.58  | (-1.35, 2.51) | 0.56 |
|                |               | 3 | 825 | 1.10  | (-0.92, 3.12) | 0.28 | 3 | 825 | 0.69  | (-1.24, 2.62) | 0.48 |
|                |               | 4 | 800 | -0.04 | (-2.07, 1.99) | 0.97 | 4 | 800 | -0.09 | (-2.03, 1.85) | 0.93 |
| <b>Science</b> | Cholesterol   | 1 | 827 | -     | -             | -    | 1 | 827 | -     | -             | -    |
|                |               | 2 | 823 | -0.14 | (-2.36, 2.08) | 0.90 | 2 | 823 | 0.09  | (-2.11, 2.29) | 0.93 |
|                |               | 3 | 839 | -0.03 | (-2.24, 2.19) | 0.98 | 3 | 839 | 0.33  | (-1.87, 2.52) | 0.77 |
|                |               | 4 | 833 | -1.36 | (-3.58, 0.86) | 0.23 | 4 | 833 | -1.09 | (-3.29, 1.10) | 0.33 |
|                | LDL           | 1 | 792 | -     | -             | -    | 1 | 792 | -     | -             | -    |
|                |               | 2 | 835 | -1.35 | (-3.59, 0.89) | 0.24 | 2 | 835 | -0.99 | (-3.21, 1.22) | 0.38 |
|                |               | 3 | 865 | -1.28 | (-3.51, 0.95) | 0.26 | 3 | 865 | -1.07 | (-3.29, 1.14) | 0.34 |
|                |               | 4 | 830 | -1.65 | (-3.91, 0.62) | 0.15 | 4 | 830 | -1.29 | (-3.52, 0.95) | 0.26 |
|                | HDL           | 1 | 874 | -     | -             | -    | 1 | 874 | -     | -             | -    |
|                |               | 2 | 832 | 0.31  | (-1.87, 2.50) | 0.78 | 2 | 832 | 0.23  | (-1.93, 2.39) | 0.84 |
|                |               | 3 | 808 | 0.29  | (-1.92, 2.50) | 0.80 | 3 | 808 | 0.46  | (-1.73, 2.64) | 0.68 |
|                |               | 4 | 808 | -1.02 | (-3.23, 1.19) | 0.36 | 4 | 808 | -1.26 | (-3.45, 0.93) | 0.26 |

|                    |               |   |     |       |                |      |   |     |       |                |      |
|--------------------|---------------|---|-----|-------|----------------|------|---|-----|-------|----------------|------|
|                    | Triglycerides | 1 | 864 | -     | -              | -    | 1 | 864 | -     | -              | -    |
|                    |               | 2 | 827 | -0.41 | (-2.61, 1.78)  | 0.71 | 2 | 827 | -0.64 | (-2.82, 1.53)  | 0.56 |
|                    |               | 3 | 830 | 2.05  | (-0.15, 4.25)  | 0.07 | 3 | 830 | 1.77  | (-0.40, 3.95)  | 0.11 |
|                    |               | 4 | 801 | 0.18  | (-2.03, 2.39)  | 0.87 | 4 | 801 | 0.18  | (-2.01, 2.37)  | 0.87 |
| <b>Key stage 2</b> |               |   |     |       |                |      |   |     |       |                |      |
| English            | Cholesterol   | 1 | 966 | -     | -              | -    | 1 | 966 | -     | -              | -    |
|                    |               | 2 | 925 | -0.91 | (-2.18, 0.36)  | 0.16 | 2 | 925 | -0.35 | (-1.54, 0.83)  | 0.56 |
|                    |               | 3 | 945 | -0.40 | (-1.66, 0.87)  | 0.54 | 3 | 945 | 0.18  | (-1.00, 1.36)  | 0.76 |
|                    |               | 4 | 936 | -1.06 | (-2.33, 0.21)  | 0.10 | 4 | 936 | -0.69 | (-1.88, 0.49)  | 0.25 |
|                    | LDL           | 1 | 918 | -     | -              | -    | 1 | 918 | -     | -              | -    |
|                    |               | 2 | 949 | -0.99 | (-2.26, 0.29)  | 0.13 | 2 | 949 | -0.57 | (-1.77, 0.62)  | 0.35 |
|                    |               | 3 | 969 | -0.39 | (-1.67, 0.88)  | 0.55 | 3 | 969 | -0.08 | (-1.27, 1.12)  | 0.9  |
|                    |               | 4 | 936 | -0.93 | (-2.22, 0.36)  | 0.16 | 4 | 936 | -0.53 | (-1.73, 0.68)  | 0.39 |
|                    | HDL           | 1 | 980 | -     | -              | -    | 1 | 980 | -     | -              | -    |
|                    |               | 2 | 959 | 1.27  | (0.02, 2.52)   | 0.05 | 2 | 959 | 0.94  | (-0.23, 2.11)  | 0.12 |
|                    |               | 3 | 919 | -0.04 | (-1.31, 1.23)  | 0.95 | 3 | 919 | -0.01 | (-1.20, 1.18)  | 0.99 |
|                    |               | 4 | 914 | 0.54  | (-0.74, 1.81)  | 0.41 | 4 | 914 | 0.16  | (-1.03, 1.35)  | 0.79 |
|                    | Triglycerides | 1 | 980 | -     | -              | -    | 1 | 980 | -     | -              | -    |
|                    |               | 2 | 944 | 0.54  | (-0.72, 1.80)  | 0.40 | 2 | 944 | -0.06 | (-1.24, 1.12)  | 0.92 |
|                    |               | 3 | 942 | 0.99  | (-0.27, 2.26)  | 0.12 | 3 | 942 | 0.39  | (-0.79, 1.57)  | 0.52 |
|                    |               | 4 | 906 | -0.01 | (-1.28, 1.27)  | 0.99 | 4 | 906 | -0.14 | (-1.32, 1.05)  | 0.82 |
| Maths              | Cholesterol   | 1 | 961 | -     | -              | -    | 1 | 961 | -     | -              | -    |
|                    |               | 2 | 929 | -0.76 | (-2.49, 0.97)  | 0.39 | 2 | 929 | -0.07 | (-1.70, 1.55)  | 0.93 |
|                    |               | 3 | 944 | -0.71 | (-2.43, 1.02)  | 0.42 | 3 | 944 | 0.02  | (-1.60, 1.64)  | 0.98 |
|                    |               | 4 | 943 | -2.37 | (-4.10, -0.65) | 0.01 | 4 | 943 | -1.84 | (-3.46, -0.21) | 0.03 |



|         |               |   |     |        |                |      |   |     |       |                |      |
|---------|---------------|---|-----|--------|----------------|------|---|-----|-------|----------------|------|
|         | LDL           | 1 | 918 | -      | -              | -    | 1 | 918 | -     | -              | -    |
|         |               | 2 | 947 | -1.60  | (-3.34, 0.14)  | 0.07 | 2 | 947 | -1.05 | (-2.69, 0.58)  | 0.21 |
|         |               | 3 | 969 | -1.45  | (-3.19, 0.29)  | 0.10 | 3 | 969 | -0.99 | (-2.63, 0.65)  | 0.24 |
|         |               | 4 | 943 | -2.24  | (-3.99, -0.48) | 0.01 | 4 | 943 | -1.72 | (-3.37, -0.07) | 0.04 |
|         | HDL           | 1 | 980 | -      | -              | -    | 1 | 980 | -     | -              | -    |
|         |               | 2 | 955 | 0.79   | (-0.91, 2.50)  | 0.36 | 2 | 955 | 0.42  | (-1.18, 2.03)  | 0.61 |
|         |               | 3 | 920 | -0.25  | (-1.98, 1.49)  | 0.78 | 3 | 920 | -0.09 | (-1.72, 1.53)  | 0.91 |
|         |               | 4 | 922 | 0.42   | (-1.32, 2.15)  | 0.64 | 4 | 922 | 0.04  | (-1.59, 1.67)  | 0.96 |
|         | Triglycerides | 1 | 978 | -      | -              | -    | 1 | 978 | -     | -              | -    |
|         |               | 2 | 948 | 1.16   | (-0.55, 2.88)  | 0.18 | 2 | 948 | 0.47  | (-1.14, 2.09)  | 0.57 |
|         |               | 3 | 944 | 0.75   | (-0.98, 2.47)  | 0.40 | 3 | 944 | -0.02 | (-1.64, 1.60)  | 0.98 |
|         |               | 4 | 907 | -0.28  | (-2.02, 1.45)  | 0.75 | 4 | 907 | -0.38 | (-2.01, 1.25)  | 0.65 |
| Science | Cholesterol   | 1 | 967 | -      | -              | -    | 1 | 967 | -     | -              | -    |
|         |               | 2 | 933 | 0.04   | (-0.90, 0.99)  | 0.93 | 2 | 933 | 0.42  | (-0.46, 1.30)  | 0.35 |
|         |               | 3 | 948 | -0.001 | (-0.95, 0.94)  | 1.00 | 3 | 948 | 0.39  | (-0.49, 1.27)  | 0.38 |
|         |               | 4 | 942 | -1.09  | (-2.04, -0.14) | 0.02 | 4 | 942 | -0.79 | (-1.67, 0.09)  | 0.08 |
|         | LDL           | 1 | 917 | -      | -              | -    | 1 | 917 | -     | -              | -    |
|         |               | 2 | 959 | -0.60  | (-1.56, 0.35)  | 0.22 | 2 | 959 | -0.28 | (-1.17, 0.61)  | 0.54 |
|         |               | 3 | 972 | -0.26  | (-1.21, 0.70)  | 0.60 | 3 | 972 | 0.04  | (-0.85, 0.94)  | 0.92 |
|         |               | 4 | 942 | -1.06  | (-2.03, -0.10) | 0.03 | 4 | 942 | -0.76 | (-1.66, 0.14)  | 0.10 |
|         | HDL           | 1 | 986 | -      | -              | -    | 1 | 986 | -     | -              | -    |
|         |               | 2 | 960 | 0.27   | (-0.67, 1.20)  | 0.58 | 2 | 960 | 0.08  | (-0.79, 0.95)  | 0.85 |
|         |               | 3 | 920 | -0.49  | (-1.44, 0.46)  | 0.31 | 3 | 920 | -0.43 | (-1.32, 0.45)  | 0.34 |
|         |               | 4 | 924 | -0.04  | (-0.99, 0.91)  | 0.93 | 4 | 924 | -0.23 | (-1.11, 0.66)  | 0.62 |

|                                   |   |     |       |                |      |   |     |       |                |      |
|-----------------------------------|---|-----|-------|----------------|------|---|-----|-------|----------------|------|
| Triglycerides                     | 1 | 980 | -     | -              | -    | 1 | 980 | -     | -              | -    |
|                                   | 2 | 954 | 1.20  | (0.26, 2.14)   | 0.01 | 2 | 954 | 0.78  | (-0.10, 1.65)  | 0.08 |
|                                   | 3 | 946 | 0.81  | (-0.13, 1.75)  | 0.09 | 3 | 946 | 0.35  | (-0.53, 1.23)  | 0.43 |
|                                   | 4 | 910 | 0.46  | (-0.49, 1.41)  | 0.34 | 4 | 910 | 0.35  | (-0.54, 1.23)  | 0.44 |
| <b><i>Working memory</i></b>      |   |     |       |                |      |   |     |       |                |      |
| Cholesterol                       | 1 | 933 | -     | -              | -    | 1 | 933 | -     | -              | -    |
|                                   | 2 | 879 | 0.01  | (-0.70, 0.71)  | 0.99 | 2 | 879 | 0.16  | (-0.53, 0.85)  | 0.65 |
|                                   | 3 | 901 | 0.05  | (-0.65, 0.75)  | 0.89 | 3 | 901 | 0.23  | (-0.46, 0.92)  | 0.52 |
|                                   | 4 | 869 | -0.12 | (-0.83, 0.59)  | 0.74 | 4 | 869 | 0.01  | (-0.68, 0.71)  | 0.97 |
| LDL                               | 1 | 890 | -     | -              | -    | 1 | 890 | -     | -              | -    |
|                                   | 2 | 909 | -0.07 | (-0.78, 0.64)  | 0.85 | 2 | 909 | 0.07  | (-0.62, 0.77)  | 0.83 |
|                                   | 3 | 912 | -0.29 | (-1.00, 0.42)  | 0.42 | 3 | 912 | -0.15 | (-0.85, 0.55)  | 0.67 |
|                                   | 4 | 871 | -0.07 | (-0.79, 0.65)  | 0.85 | 4 | 871 | 0.09  | (-0.61, 0.80)  | 0.8  |
| HDL                               | 1 | 928 | -     | -              | -    | 1 | 928 | -     | -              | -    |
|                                   | 2 | 912 | 0.24  | (-0.46, 0.94)  | 0.49 | 2 | 912 | 0.15  | (-0.54, 0.83)  | 0.68 |
|                                   | 3 | 891 | 0.28  | (-0.43, 0.98)  | 0.44 | 3 | 891 | 0.24  | (-0.45, 0.93)  | 0.5  |
|                                   | 4 | 851 | 0.40  | (-0.31, 1.12)  | 0.27 | 4 | 851 | 0.32  | (-0.38, 1.02)  | 0.37 |
| Triglycerides                     | 1 | 915 | -     | -              | -    | 1 | 915 | -     | -              | -    |
|                                   | 2 | 911 | -0.13 | (-0.83, 0.57)  | 0.72 | 2 | 911 | -0.29 | (-0.98, 0.40)  | 0.41 |
|                                   | 3 | 901 | -0.19 | (-0.89, 0.52)  | 0.6  | 3 | 901 | -0.34 | (-1.04, 0.35)  | 0.33 |
|                                   | 4 | 855 | 0.03  | (-0.69, 0.74)  | 0.94 | 4 | 855 | -0.02 | (-0.72, 0.68)  | 0.95 |
| <b><i>Non word repetition</i></b> |   |     |       |                |      |   |     |       |                |      |
| Cholesterol                       | 1 | 961 | -     | -              | -    | 1 | 961 | -     | -              | -    |
|                                   | 2 | 907 | -0.05 | (-0.27, 0.18)  | 0.68 | 2 | 907 | 0     | (-0.22, 0.21)  | 0.97 |
|                                   | 3 | 947 | -0.10 | (-0.32, 0.12)  | 0.38 | 3 | 947 | -0.04 | (-0.26, 0.18)  | 0.71 |
|                                   | 4 | 921 | -0.29 | (-0.52, -0.06) | 0.01 | 4 | 921 | -0.24 | (-0.46, -0.02) | 0.03 |

|               |   |     |       |                |      |   |     |       |                |      |
|---------------|---|-----|-------|----------------|------|---|-----|-------|----------------|------|
| LDL           | 1 | 923 | -     | -              | -    | 1 | 923 | -     | -              | -    |
|               | 2 | 939 | -0.08 | (-0.31, 0.14)  | 0.46 | 2 | 939 | -0.02 | (-0.24, 0.20)  | 0.83 |
|               | 3 | 946 | -0.13 | (-0.35, 0.10)  | 0.28 | 3 | 946 | -0.08 | (-0.30, 0.14)  | 0.49 |
|               | 4 | 928 | -0.31 | (-0.54, -0.08) | 0.01 | 4 | 928 | -0.24 | (-0.46, -0.02) | 0.04 |
| HDL           | 1 | 947 | -     | -              | -    | 1 | 947 | -     | -              | -    |
|               | 2 | 965 | 0.03  | (-0.19, 0.25)  | 0.78 | 2 | 965 | -0.01 | (-0.23, 0.21)  | 0.92 |
|               | 3 | 911 | -0.02 | (-0.24, 0.21)  | 0.9  | 3 | 911 | -0.04 | (-0.26, 0.18)  | 0.7  |
|               | 4 | 913 | 0.001 | (-0.23, 0.23)  | 0.99 | 4 | 913 | -0.03 | (-0.25, 0.19)  | 0.77 |
| Triglycerides | 1 | 942 | -     | -              | -    | 1 | 942 | -     | -              | -    |
|               | 2 | 943 | 0.04  | (-0.19, 0.26)  | 0.75 | 2 | 943 | -0.01 | (-0.23, 0.21)  | 0.91 |
|               | 3 | 938 | 0.03  | (-0.19, 0.26)  | 0.78 | 3 | 938 | -0.02 | (-0.24, 0.20)  | 0.88 |
|               | 4 | 913 | -0.12 | (-0.34, 0.11)  | 0.31 | 4 | 913 | -0.13 | (-0.35, 0.09)  | 0.25 |

<sup>a</sup> Coefficients represent change in each cognitive function score for each quartile of lipid compared to the lowest quartile

<sup>b</sup> Age, sex, maternal education, household social class adjusted

**Table S6. Attainment at key stage 1 by APOE genotype**

|                | $\epsilon 2/\epsilon 2$ |            | $\epsilon 3/\epsilon 2$ |            | $\epsilon 4/\epsilon 2$ |            | $\epsilon 3/\epsilon 3$ |            | $\epsilon 3/\epsilon 4$ |            | $\epsilon 4/\epsilon 4$ |            | <b>Total</b> |            | <b>P<sup>a</sup></b> |
|----------------|-------------------------|------------|-------------------------|------------|-------------------------|------------|-------------------------|------------|-------------------------|------------|-------------------------|------------|--------------|------------|----------------------|
|                | <b>N</b>                | <b>(%)</b> | <b>N</b>                | <b>(%)</b> | <b>N</b>                | <b>(%)</b> | <b>N</b>                | <b>(%)</b> | <b>N</b>                | <b>(%)</b> | <b>N</b>                | <b>(%)</b> | <b>N</b>     | <b>(%)</b> |                      |
| <b>Reading</b> |                         |            |                         |            |                         |            |                         |            |                         |            |                         |            |              |            |                      |
| Below average  | 6                       | (14.6)     | 93                      | (13.7)     | 12                      | (9.4)      | 391                     | (13.6)     | 156                     | (13.6)     | 16                      | (15.2)     | 674          | (13.6)     |                      |
| Average        | 23                      | (56.1)     | 357                     | (52.4)     | 70                      | (54.7)     | 1450                    | (50.5)     | 602                     | (52.5)     | 48                      | (45.7)     | 2550         | (51.3)     |                      |
| Above average  | 12                      | (29.27)    | 231                     | (33.9)     | 46                      | (35.9)     | 1029                    | (35.9)     | 389                     | (33.9)     | 41                      | (39.1)     | 1748         | (35.2)     | p = 0.82             |
| <b>Writing</b> |                         |            |                         |            |                         |            |                         |            |                         |            |                         |            |              |            |                      |
| Below average  | 5                       | (12.2)     | 102                     | (15.0)     | 13                      | (10.2)     | 387                     | (13.5)     | 152                     | (13.2)     | 18                      | (17.1)     | 677          | (13.6)     |                      |
| Average        | 33                      | (80.5)     | 527                     | (77.5)     | 102                     | (79.7)     | 2236                    | (78.0)     | 902                     | (78.5)     | 74                      | (70.5)     | 3874         | (78.0)     |                      |
| Above average  | 3                       | (7.32)     | 51                      | (7.50)     | 13                      | (10.2)     | 244                     | (8.51)     | 95                      | (8.3)      | 13                      | (12.4)     | 419          | (8.4)      | p = 0.69             |
| <b>Maths</b>   |                         |            |                         |            |                         |            |                         |            |                         |            |                         |            |              |            |                      |
| Below average  | 3                       | (7.32)     | 70                      | (10.3)     | 5                       | (3.9)      | 255                     | (8.9)      | 97                      | (8.5)      | 11                      | (10.5)     | 441          | (8.9)      |                      |
| Average        | 34                      | (82.9)     | 433                     | (63.8)     | 84                      | (65.6)     | 1860                    | (64.9)     | 737                     | (64.2)     | 69                      | (65.7)     | 3217         | (64.8)     |                      |
| Above average  | 4                       | (9.76)     | 176                     | (25.9)     | 39                      | (30.5)     | 751                     | (26.2)     | 314                     | (27.4)     | 25                      | (23.8)     | 1309         | (26.4)     | p = 0.18             |

<sup>a</sup> p value from chi square test

**Table S7. Associations of APOE genotype with IQ, stratified by sex**

|                       |                         | Males              |                |                | Females                 |        |                |
|-----------------------|-------------------------|--------------------|----------------|----------------|-------------------------|--------|----------------|
|                       |                         | Coeff <sup>a</sup> | 95% CI         | P <sup>b</sup> | Coeff <sup>a</sup>      | 95% CI | P <sup>b</sup> |
| <b>Total IQ</b>       | <b>N = 2121</b>         |                    |                |                | <b>N = 1804</b>         |        |                |
|                       | $\epsilon 2/\epsilon 2$ | 2.67               | (-5.31, 10.65) |                | $\epsilon 2/\epsilon 2$ | 5.02   | (-3.45, 13.50) |
|                       | $\epsilon 2/\epsilon 3$ | 0.49               | (-1.59, 2.56)  |                | $\epsilon 2/\epsilon 3$ | 0.16   | (-2.12, 2.44)  |
|                       | $\epsilon 2/\epsilon 4$ | 2.70               | (-1.70, 7.09)  |                | $\epsilon 2/\epsilon 4$ | -1.32  | (-5.95, 3.31)  |
|                       | $\epsilon 3/\epsilon 3$ | -                  | -              |                | $\epsilon 3/\epsilon 3$ | -      | -              |
|                       | $\epsilon 3/\epsilon 4$ | 1.62               | (-0.12, 3.35)  |                | $\epsilon 3/\epsilon 4$ | -1.63  | (-3.35, 0.10)  |
|                       | $\epsilon 4/\epsilon 4$ | -0.18              | (-4.95, 4.58)  | 0.45           | $\epsilon 4/\epsilon 4$ | 6.37   | (1.29, 11.45)  |
| <b>Verbal IQ</b>      | <b>N = 2127</b>         |                    |                |                | <b>N = 1811</b>         |        |                |
|                       | $\epsilon 2/\epsilon 2$ | 2.52               | (-5.71, 10.74) |                | $\epsilon 2/\epsilon 2$ | 5.75   | (-2.68, 14.17) |
|                       | $\epsilon 2/\epsilon 3$ | -0.30              | (-2.43, 1.84)  |                | $\epsilon 2/\epsilon 3$ | 0.32   | (-1.94, 2.57)  |
|                       | $\epsilon 2/\epsilon 4$ | 1.84               | (-2.69, 6.36)  |                | $\epsilon 2/\epsilon 4$ | -1.53  | (-6.13, 3.07)  |
|                       | $\epsilon 3/\epsilon 3$ | -                  | -              |                | $\epsilon 3/\epsilon 3$ | -      | -              |
|                       | $\epsilon 3/\epsilon 4$ | 0.55               | (-1.23, 2.33)  |                | $\epsilon 3/\epsilon 4$ | -1.45  | (-3.17, 0.26)  |
|                       | $\epsilon 4/\epsilon 4$ | -1.14              | (-6.05, 3.76)  | 0.88           | $\epsilon 4/\epsilon 4$ | 6.73   | (1.68, 11.78)  |
| <b>Performance IQ</b> | <b>N = 2132</b>         |                    |                |                | <b>N = 1808</b>         |        |                |
|                       | $\epsilon 2/\epsilon 2$ | 2.95               | (-5.33, 11.23) |                | $\epsilon 2/\epsilon 2$ | 2.74   | (-6.17, 11.65) |
|                       | $\epsilon 2/\epsilon 3$ | 1.67               | (-0.48, 3.82)  |                | $\epsilon 2/\epsilon 3$ | -0.18  | (-2.57, 2.21)  |
|                       | $\epsilon 2/\epsilon 4$ | 2.93               | (-1.63, 7.49)  |                | $\epsilon 2/\epsilon 4$ | -0.66  | (-5.53, 4.20)  |
|                       | $\epsilon 3/\epsilon 3$ | -                  | -              |                | $\epsilon 3/\epsilon 3$ | -      | -              |
|                       | $\epsilon 3/\epsilon 4$ | 2.72               | (0.93, 4.52)   |                | $\epsilon 3/\epsilon 4$ | -1.16  | (-2.97, 0.66)  |
|                       | $\epsilon 4/\epsilon 4$ | 0.97               | (-3.97, 5.91)  | 0.06           | $\epsilon 4/\epsilon 4$ | 4.43   | (-0.91, 9.78)  |

<sup>a</sup> Coefficient from linear regression, adjusted for age at IQ testing with  $\epsilon 3/\epsilon 3$  genotype as reference group

<sup>b</sup> P values for heterogeneity from analysis of covariance model

**Table S8. Associations of APOE genotype with SATS scores, stratified by sex**

|                         | Males              |                 |                | Females                 |        |                |      |
|-------------------------|--------------------|-----------------|----------------|-------------------------|--------|----------------|------|
|                         | Coeff <sup>a</sup> | 95% CI          | P <sup>b</sup> | Coeff <sup>a</sup>      | 95% CI | P <sup>b</sup> |      |
| <b>Key Stage 2</b>      |                    |                 |                |                         |        |                |      |
| <b>English</b>          |                    |                 |                |                         |        |                |      |
| <b>N = 2739</b>         |                    |                 |                | <b>N = 2506</b>         |        |                |      |
| $\epsilon 2/\epsilon 2$ | 3.96               | (-2.15, 10.06)  |                | $\epsilon 2/\epsilon 2$ | 2.40   | (-4.20, 8.99)  |      |
| $\epsilon 2/\epsilon 3$ | -0.34              | (-2.08, 1.40)   |                | $\epsilon 2/\epsilon 3$ | -1.19  | (-3.03, 0.65)  |      |
| $\epsilon 2/\epsilon 4$ | 1.16               | (-2.38, 4.70)   |                | $\epsilon 2/\epsilon 4$ | -2.25  | (-6.08, 1.58)  |      |
| $\epsilon 3/\epsilon 3$ | -                  | -               |                | $\epsilon 3/\epsilon 3$ | -      | -              |      |
| $\epsilon 3/\epsilon 4$ | 0.93               | (-0.53, 2.39)   |                | $\epsilon 3/\epsilon 4$ | -2.31  | (-3.73, -0.88) |      |
| $\epsilon 4/\epsilon 4$ | -2.19              | (-6.25, 1.87)   | 0.39           | $\epsilon 4/\epsilon 4$ | 1.54   | (-2.41, 5.50)  | 0.02 |
| <b>Maths</b>            |                    |                 |                |                         |        |                |      |
| <b>N = 2762</b>         |                    |                 |                | <b>N = 2501</b>         |        |                |      |
| $\epsilon 2/\epsilon 2$ | 4.34               | (-3.78, 12.45)  |                | $\epsilon 2/\epsilon 2$ | 3.03   | (-6.17, 12.23) |      |
| $\epsilon 2/\epsilon 3$ | -0.98              | (-3.28, 1.31)   |                | $\epsilon 2/\epsilon 3$ | -0.02  | (-2.52, 2.49)  |      |
| $\epsilon 2/\epsilon 4$ | -0.19              | (-4.93, 4.54)   |                | $\epsilon 2/\epsilon 4$ | -2.10  | (-7.30, 3.11)  |      |
| $\epsilon 3/\epsilon 3$ | -                  | -               |                | $\epsilon 3/\epsilon 3$ | -      | -              |      |
| $\epsilon 3/\epsilon 4$ | 0.47               | (-1.47, 2.40)   |                | $\epsilon 3/\epsilon 4$ | -2.10  | (-4.04, -0.16) |      |
| $\epsilon 4/\epsilon 4$ | -6.13              | (-11.53, -0.73) | 0.20           | $\epsilon 4/\epsilon 4$ | 2.41   | (-3.02, 7.83)  | 0.23 |
| <b>Science</b>          |                    |                 |                |                         |        |                |      |
| <b>N = 2796</b>         |                    |                 |                | <b>N = 2514</b>         |        |                |      |
| $\epsilon 2/\epsilon 2$ | 3.06               | (-1.61, 7.72)   |                | $\epsilon 2/\epsilon 2$ | 3.67   | (-1.76, 9.10)  |      |
| $\epsilon 2/\epsilon 3$ | -0.85              | (-2.14, 0.43)   |                | $\epsilon 2/\epsilon 3$ | 0.08   | (-1.40, 1.56)  |      |
| $\epsilon 2/\epsilon 4$ | 0.69               | (-1.96, 3.34)   |                | $\epsilon 2/\epsilon 4$ | -0.77  | (-3.84, 2.30)  |      |
| $\epsilon 3/\epsilon 3$ | -                  | -               |                | $\epsilon 3/\epsilon 3$ | -      | -              |      |
| $\epsilon 3/\epsilon 4$ | 0.39               | (-0.69, 1.48)   |                | $\epsilon 3/\epsilon 4$ | -1.49  | (-2.64, -0.35) |      |
| $\epsilon 4/\epsilon 4$ | -1.45              | (-4.49, 1.59)   | 0.34           | $\epsilon 4/\epsilon 4$ | 2.47   | (-0.70, 5.64)  | 0.03 |
| <b>Key Stage 3</b>      |                    |                 |                |                         |        |                |      |
| <b>English</b>          |                    |                 |                |                         |        |                |      |
| <b>N = 2337</b>         |                    |                 |                | <b>N = 2150</b>         |        |                |      |
| $\epsilon 2/\epsilon 2$ | 3.78               | (-3.44, 10.99)  |                | $\epsilon 2/\epsilon 2$ | 2.75   | (-4.68, 10.18) |      |
| $\epsilon 2/\epsilon 3$ | -0.20              | (-2.26, 1.86)   |                | $\epsilon 2/\epsilon 3$ | 1.46   | (-0.71, 3.63)  |      |
| $\epsilon 2/\epsilon 4$ | 0.43               | (-3.84, 4.70)   |                | $\epsilon 2/\epsilon 4$ | 1.17   | (-3.31, 5.64)  |      |
| $\epsilon 3/\epsilon 3$ | -                  | -               |                | $\epsilon 3/\epsilon 3$ | -      | -              |      |
| $\epsilon 3/\epsilon 4$ | 1.01               | (-0.75, 2.78)   |                | $\epsilon 3/\epsilon 4$ | -0.93  | (-2.63, 0.76)  |      |
| $\epsilon 4/\epsilon 4$ | -2.27              | (-6.95, 2.41)   | 0.61           | $\epsilon 4/\epsilon 4$ | 3.41   | (-1.36, 8.19)  | 0.26 |
| <b>Maths</b>            |                    |                 |                |                         |        |                |      |
| <b>N = 2419</b>         |                    |                 |                | <b>N = 2188</b>         |        |                |      |
| $\epsilon 2/\epsilon 2$ | 1.52               | (-7.38, 10.41)  |                | $\epsilon 2/\epsilon 2$ | 1.11   | (-8.30, 10.52) |      |
| $\epsilon 2/\epsilon 3$ | -1.39              | (-3.89, 1.12)   |                | $\epsilon 2/\epsilon 3$ | -1.32  | (-4.11, 1.48)  |      |

|                               |       |                |      |                               |       |                |      |
|-------------------------------|-------|----------------|------|-------------------------------|-------|----------------|------|
| $\varepsilon 2/\varepsilon 4$ | 1.21  | (-3.97, 6.40)  |      | $\varepsilon 2/\varepsilon 4$ | -3.88 | (-9.64, 1.87)  |      |
| $\varepsilon 3/\varepsilon 3$ | -     | -              |      | $\varepsilon 3/\varepsilon 3$ | -     | -              |      |
| $\varepsilon 3/\varepsilon 4$ | 0.99  | (-1.16, 3.14)  |      | $\varepsilon 3/\varepsilon 4$ | -0.60 | (-2.79, 1.58)  |      |
| $\varepsilon 4/\varepsilon 4$ | -4.62 | (-10.24, 1.01) | 0.34 | $\varepsilon 4/\varepsilon 4$ | 5.19  | (-0.83, 11.22) | 0.31 |
| <b>Science</b>                |       |                |      |                               |       |                |      |
| <b>N = 2439</b>               |       |                |      | <b>N = 2196</b>               |       |                |      |
| $\varepsilon 2/\varepsilon 2$ | -1.99 | (-11.74, 7.75) |      | $\varepsilon 2/\varepsilon 2$ | -3.79 | (-14.46, 6.88) |      |
| $\varepsilon 2/\varepsilon 3$ | 2.31  | (-0.43, 5.05)  |      | $\varepsilon 2/\varepsilon 3$ | -0.72 | (-3.88, 2.44)  |      |
| $\varepsilon 2/\varepsilon 4$ | 1.57  | (-4.07, 7.20)  |      | $\varepsilon 2/\varepsilon 4$ | 0.01  | (-6.46, 6.49)  |      |
| $\varepsilon 3/\varepsilon 3$ | -     | -              |      | $\varepsilon 3/\varepsilon 3$ | -     | -              |      |
| $\varepsilon 3/\varepsilon 4$ | 1.36  | (-0.99, 3.70)  |      | $\varepsilon 3/\varepsilon 4$ | 1.26  | (-1.21, 3.73)  |      |
| $\varepsilon 4/\varepsilon 4$ | 1.11  | (-5.05, 7.27)  | 0.59 | $\varepsilon 4/\varepsilon 4$ | 5.07  | (-1.82, 11.97) | 0.55 |

<sup>a</sup> Coefficient from linear regression, adjusted for age child's age in months with  $\varepsilon 3/\varepsilon 3$  genotype as reference group

<sup>b</sup> P values for heterogeneity from analysis of covariance model
